# Supplementary material for: Feeling Blue or Seeing Red? Similar Patterns of Emotion Associations With Colour Patches and Colour Terms
Source: PubMed Central journal article supplement (PMC7027086; doi:10.1177/2041669520902484), 2020-02-02
Supplement: IPE902484_Supplemental_material.pdf [file IPE902484_Supplemental_material.pdf]

## Supplementary material

**Table S 1.** Colour and emotion terms in English and French. The validated French version of emotion terms taken from <http://www.affective-sciences.org/gew>. French has two basic terms for the “brown” category – *brun* and *marron* (Forbes, 1979). We chose *brun* since it has the least contextually restricted meaning (N. C. W. Spence, 1989). However, we hypothesise that *marron* would result in very similar affective associations to *brun*, since both *brun* and *marron* map to comparable perceptual colours (N. C. W. Spence, 1989).

| English        | French       |
|----------------|--------------|
| Red            | Rouge        |
| Orange         | Orange       |
| Yellow         | Jaune        |
| Green          | Vert         |
| Turquoise      | Turquoise    |
| Blue           | Bleu         |
| Purple         | Violet       |
| Pink           | Rose         |
| Brown          | Brun         |
| White          | Blanc        |
| Grey           | Gris         |
| Black          | Noir         |
| Interest       | Intérêt      |
| Amusement      | Amusement    |
| Pride          | Fierté       |
| Joy            | Joie         |
| Pleasure       | Plaisir      |
| Contentment    | Contentement |
| Admiration     | Admiration   |
| Love           | Amour        |
| Relief         | Soulagement  |
| Compassion     | Compassion   |
| Sadness        | Tristesse    |
| Guilt          | Culpabilité  |
| Regret         | Regret       |
| Shame          | Honte        |
| Disappointment | Déception    |
| Fear           | Peur         |
| Disgust        | Dégoût       |
| Contempt       | Mépris       |
| Hate           | Haine        |
| Anger          | Colère       |

**Table S 2.** The 20 emotions used in the Geneva Emotion Wheel. We show their categorisation regarding on emotion dimensions of valence, arousal, and power (Fontaine, 2013; Scherer, 2005; Scherer et al., 2013; Soriano et al., 2013).

| Emotion        | Valence  | Arousal | Power  |
|----------------|----------|---------|--------|
| Interest       | Positive | Low     | Strong |
| Amusement      | Positive | High    | Strong |
| Pride          | Positive | Low     | Strong |
| Joy            | Positive | High    | Strong |
| Pleasure       | Positive | High    | Strong |
| Contentment    | Positive | Low     | Weak   |
| Admiration     | Positive | High    | Weak   |
| Love           | Positive | High    | Weak   |
| Relief         | Positive | Low     | Weak   |
| Compassion     | Positive | Low     | Weak   |
| Sadness        | Negative | Low     | Weak   |
| Guilt          | Negative | High    | Weak   |
| Regret         | Negative | Low     | Weak   |
| Shame          | Negative | High    | Weak   |
| Disappointment | Negative | Low     | Weak   |
| Fear           | Negative | High    | Strong |
| Disgust        | Negative | Low     | Strong |
| Contempt       | Negative | Low     | Strong |
| Hate           | Negative | High    | Strong |
| Anger          | Negative | High    | Strong |

**Table S 3.** This colour-emotion association matrix indicates the proportion of participants who endorse given colours as being associated with given emotions. These proportions were derived from pooled data, i.e., colour-emotion associations for both colour terms and colour patches.

|                | BLACK | BLUE | BROWN | GREEN | GREY | ORANGE | PINK | PURPLE | RED | TURQUOISE | WHITE | YELLOW |
|----------------|-------|------|-------|-------|------|--------|------|--------|-----|-----------|-------|--------|
| Interest       | .08   | .30  | .08   | .33   | .08  | .23    | .17  | .20    | .18 | .29       | .21   | .20    |
| Amusement      | .03   | .26  | .05   | .36   | .03  | .41    | .42  | .18    | .13 | .33       | .08   | .44    |
| Pride          | .09   | .24  | .05   | .18   | .05  | .17    | .11  | .14    | .23 | .18       | .22   | .26    |
| Joy            | .02   | .32  | .05   | .33   | .03  | .48    | .55  | .14    | .17 | .45       | .18   | .61    |
| Pleasure       | .04   | .30  | .08   | .30   | .04  | .35    | .63  | .19    | .39 | .41       | .14   | .36    |
| Contentment    | .06   | .33  | .10   | .31   | .07  | .28    | .33  | .17    | .13 | .33       | .25   | .24    |
| Admiration     | .05   | .36  | .07   | .19   | .06  | .26    | .33  | .12    | .20 | .27       | .23   | .36    |
| Love           | .03   | .12  | .06   | .11   | .04  | .07    | .63  | .17    | .68 | .11       | .15   | .10    |
| Relief         | .04   | .38  | .09   | .22   | .11  | .14    | .23  | .14    | .07 | .33       | .44   | .16    |
| Compassion     | .05   | .25  | .10   | .14   | .08  | .16    | .32  | .20    | .17 | .20       | .25   | .19    |
| Sadness        | .45   | .27  | .11   | .06   | .61  | .08    | .04  | .19    | .05 | .11       | .12   | .04    |
| Guilt          | .34   | .15  | .14   | .14   | .32  | .08    | .05  | .20    | .13 | .05       | .11   | .12    |
| Regret         | .45   | .17  | .20   | .11   | .55  | .08    | .05  | .15    | .11 | .08       | .17   | .07    |
| Shame          | .27   | .06  | .18   | .11   | .22  | .08    | .08  | .16    | .28 | .04       | .08   | .11    |
| Disappointment | .48   | .12  | .20   | .09   | .54  | .08    | .05  | .19    | .08 | .07       | .11   | .08    |
| Fear           | .45   | .16  | .06   | .11   | .21  | .05    | .05  | .11    | .16 | .06       | .12   | .12    |
| Disgust        | .35   | .02  | .50   | .27   | .20  | .08    | .06  | .19    | .11 | .05       | .04   | .18    |
| Contempt       | .43   | .06  | .26   | .12   | .26  | .15    | .05  | .16    | .20 | .05       | .07   | .15    |
| Hate           | .47   | .03  | .07   | .08   | .11  | .11    | .04  | .13    | .51 | .04       | .03   | .05    |
| Anger          | .34   | .03  | .08   | .08   | .10  | .11    | .04  | .12    | .73 | .04       | .02   | .12    |

**Table S 4.** This colour-emotion association matrix indicates the proportion of participants who endorse given colours as being associated with given emotions. These proportions were derived from colour-emotion associations for colour terms.

| <i>Terms</i>   | BLACK | BLUE | BROWN | GREEN | GREY | ORANGE | PINK | PURPLE | RED | TURQUOISE | WHITE | YELLOW |
|----------------|-------|------|-------|-------|------|--------|------|--------|-----|-----------|-------|--------|
| Interest       | .10   | .26  | .12   | .35   | .08  | .26    | .15  | .27    | .19 | .23       | .22   | .19    |
| Amusement      | .04   | .22  | .06   | .45   | .05  | .46    | .47  | .22    | .12 | .29       | .10   | .40    |
| Pride          | .13   | .29  | .06   | .19   | .06  | .18    | .09  | .22    | .21 | .21       | .24   | .19    |
| Joy            | .04   | .36  | .08   | .36   | .05  | .49    | .63  | .19    | .15 | .50       | .22   | .56    |
| Pleasure       | .04   | .27  | .08   | .29   | .06  | .36    | .72  | .22    | .41 | .41       | .13   | .35    |
| Contentment    | .06   | .26  | .14   | .33   | .06  | .28    | .29  | .19    | .15 | .35       | .27   | .19    |
| Admiration     | .06   | .32  | .09   | .21   | .08  | .26    | .28  | .19    | .15 | .26       | .28   | .31    |
| Love           | .05   | .12  | .05   | .13   | .05  | .10    | .72  | .15    | .74 | .09       | .17   | .10    |
| Relief         | .05   | .40  | .09   | .22   | .06  | .12    | .23  | .13    | .05 | .31       | .49   | .17    |
| Compassion     | .06   | .28  | .13   | .15   | .08  | .17    | .28  | .21    | .15 | .14       | .29   | .15    |
| Sadness        | .58   | .31  | .09   | .05   | .64  | .06    | .06  | .17    | .06 | .12       | .15   | .05    |
| Guilt          | .37   | .19  | .15   | .13   | .33  | .08    | .06  | .18    | .14 | .06       | .10   | .15    |
| Regret         | .59   | .22  | .19   | .09   | .60  | .08    | .04  | .17    | .10 | .06       | .18   | .10    |
| Shame          | .32   | .10  | .21   | .13   | .24  | .09    | .05  | .15    | .35 | .05       | .10   | .13    |
| Disappointment | .54   | .15  | .14   | .08   | .60  | .08    | .06  | .17    | .08 | .08       | .15   | .10    |
| Fear           | .55   | .21  | .04   | .14   | .26  | .05    | .05  | .13    | .12 | .05       | .12   | .15    |
| Disgust        | .31   | .04  | .38   | .29   | .26  | .08    | .06  | .18    | .13 | .08       | .06   | .26    |
| Contempt       | .53   | .09  | .22   | .13   | .29  | .14    | .05  | .15    | .23 | .06       | .09   | .18    |
| Hate           | .67   | .04  | .08   | .12   | .14  | .13    | .05  | .14    | .63 | .06       | .05   | .08    |
| Anger          | .47   | .05  | .10   | .09   | .12  | .14    | .05  | .14    | .83 | .06       | .03   | .15    |

**Table S 5.** This colour-emotion association matrix indicates the proportion of participants who endorse given colours as being associated with given emotions. These proportions were derived from colour-emotion associations for colour patches.

| <i>Patches</i> | BLACK | BLUE | BROWN | GREEN | GREY | ORANGE | PINK | PURPLE | RED | TURQUOISE | WHITE | YELLOW |
|----------------|-------|------|-------|-------|------|--------|------|--------|-----|-----------|-------|--------|
| Interest       | .04   | .37  | .04   | .31   | .07  | .20    | .19  | .09    | .17 | .37       | .20   | .22    |
| Amusement      | .02   | .31  | .02   | .24   | .00  | .33    | .35  | .13    | .15 | .39       | .04   | .50    |
| Pride          | .04   | .17  | .02   | .17   | .02  | .17    | .15  | .04    | .26 | .15       | .19   | .35    |
| Joy            | .00   | .26  | .02   | .28   | .00  | .48    | .44  | .07    | .20 | .37       | .13   | .69    |
| Pleasure       | .04   | .35  | .07   | .30   | .00  | .33    | .50  | .15    | .37 | .41       | .17   | .37    |
| Contentment    | .06   | .44  | .04   | .28   | .07  | .28    | .39  | .15    | .09 | .30       | .22   | .31    |
| Admiration     | .02   | .43  | .04   | .17   | .04  | .26    | .39  | .02    | .26 | .30       | .15   | .43    |
| Love           | .00   | .13  | .07   | .07   | .02  | .02    | .50  | .20    | .59 | .15       | .13   | .09    |
| Relief         | .02   | .35  | .09   | .22   | .19  | .17    | .24  | .17    | .09 | .35       | .37   | .15    |
| Compassion     | .02   | .20  | .06   | .13   | .09  | .15    | .37  | .19    | .19 | .30       | .19   | .24    |
| Sadness        | .26   | .22  | .15   | .07   | .57  | .09    | .00  | .22    | .04 | .11       | .07   | .02    |
| Guilt          | .30   | .09  | .13   | .15   | .30  | .09    | .04  | .22    | .11 | .04       | .11   | .07    |
| Regret         | .24   | .11  | .20   | .13   | .48  | .09    | .07  | .13    | .11 | .09       | .15   | .02    |
| Shame          | .20   | .00  | .15   | .09   | .19  | .06    | .11  | .17    | .19 | .02       | .04   | .07    |
| Disappointment | .41   | .07  | .30   | .11   | .44  | .09    | .02  | .22    | .07 | .06       | .06   | .06    |
| Fear           | .30   | .09  | .09   | .07   | .15  | .04    | .04  | .07    | .22 | .07       | .13   | .07    |
| Disgust        | .41   | .00  | .67   | .22   | .13  | .09    | .06  | .20    | .07 | .02       | .00   | .07    |
| Contempt       | .30   | .02  | .31   | .11   | .20  | .17    | .06  | .17    | .17 | .02       | .04   | .11    |
| Hate           | .19   | .02  | .06   | .04   | .06  | .07    | .02  | .11    | .33 | .00       | .00   | .02    |
| Anger          | .15   | .00  | .06   | .07   | .07  | .06    | .02  | .09    | .59 | .00       | .00   | .07    |

**Table S 6.** Valence, arousal, and power loadings for each colour, separated by term and patch. The term *Bias* represents the mean loading, and 95% CI represents 95% confidence intervals of the mean. The same information appears in **Error! Reference source not found..**

| Colour presentation mode | Colour    | Valence |                | Arousal |                 | Power |                |
|--------------------------|-----------|---------|----------------|---------|-----------------|-------|----------------|
|                          |           | Bias    | 95% CI         | Bias    | 95% CI          | Bias  | 95% CI         |
| Colour term              | Red       | -0.33   | [-0.86, 0.19]  | 2.28    | [1.92, 2.65]    | 1.03  | [0.70, 1.36]   |
|                          | Orange    | 1.74    | [1.24, 2.24]   | 0.72    | [0.30, 1.14]    | 0.97  | [0.62, 1.33]   |
|                          | Yellow    | 1.26    | [0.61, 1.91]   | 0.80    | [0.49, 1.10]    | 1.05  | [0.74, 1.36]   |
|                          | Green     | 1.44    | [0.76, 2.11]   | 0.15    | [-0.17, 0.48]   | 0.90  | [0.58, 1.22]   |
|                          | Turquoise | 2.09    | [1.59, 2.61]   | 0.22    | [-0.11, 0.55]   | 0.45  | [0.11, 0.79]   |
|                          | Blue      | 1.37    | [0.83, 1.92]   | -0.42   | [-0.80, -0.05]  | -0.53 | [-0.96, -0.09] |
|                          | Purple    | 0.41    | [-0.22, 1.04]  | -0.13   | [-0.48, 0.22]   | 0.15  | [-0.19, 0.50]  |
|                          | Pink      | 3.32    | [2.76, 3.89]   | 1.76    | [1.42, 2.09]    | 0.24  | [-0.04, 0.53]  |
|                          | Brown     | -0.71   | [-1.07, -0.34] | -0.63   | [-0.86, -0.39]  | -0.06 | [-0.37, 0.24]  |
|                          | Grey      | 1.37    | [0.88, 1.86]   | -0.86   | [-1.22, -0.50]  | -0.94 | [-1.23, -0.64] |
|                          | White     | -2.85   | [-3.37, -2.32] | -1.36   | [-1.63, -1.09]  | -1.39 | [-1.73, -1.04] |
|                          | Black     | -4.28   | [-4.95, -3.61] | -0.33   | [-0.64, -0.03]  | 0.18  | [-0.19, 0.55]  |
| Colour patch             | Red       | 0.46    | [-0.38, 1.31]  | 1.76    | [1.34, 2.18]    | 0.80  | [0.40, 1.19]   |
|                          | Orange    | 1.54    | [0.74, 2.33]   | 0.24    | [-0.23, 0.71]   | 0.65  | [0.23, 1.06]   |
|                          | Yellow    | 2.76    | [2.04, 3.48]   | 0.83    | [0.46, 1.21]    | 1.02  | [0.61, 1.42]   |
|                          | Green     | 1.09    | [0.15, 2.04]   | -0.28   | [-0.74, 0.19]   | 0.39  | [-0.02, 0.80]  |
|                          | Turquoise | 2.65    | [1.91, 3.39]   | -0.02   | [-0.39, 0.35]   | 0.09  | [-0.35, 0.54]  |
|                          | Blue      | 2.39    | [1.59, 3.19]   | -0.28   | [-0.72, 0.16]   | -0.46 | [-0.91, -0.02] |
|                          | Purple    | -0.41   | [-1.23, 0.42]  | -0.33   | [-0.65, -0.02]  | -0.56 | [-1.02, -0.09] |
|                          | Pink      | 3.09    | [2.32, 3.87]   | 0.87    | [0.39, 1.35]    | -0.32 | [-0.76, 0.13]  |
|                          | Brown     | -1.65   | [-2.18, -1.11] | -1.17   | [-1.47, -0.86]  | 0.13  | [-0.31, 0.56]  |
|                          | Grey      | 1.19    | [0.60, 1.78]   | -0.59   | [-0.92, -0.26]  | -0.59 | [-0.90, -0.29] |
|                          | White     | -2.09   | [-2.76, -1.43] | -1.46   | [-1.78, -1.15]  | -1.69 | [-2.08, -1.29] |
|                          | Black     | -2.50   | [-3.19, -1.81] | -0.57   | [-0.960, -0.19] | -0.06 | [-0.55, 0.44]  |

*Emotion with colour terms vs. colour patches*
